# Supplementary material for: Fidelity Variants of RNA Dependent RNA Polymerases Uncover an Indirect, Mutagenic Activity of Amiloride Compounds
Source: PubMed Central journal article supplement (PMC2965762; doi:10.1371/journal.ppat.1001163), 2010-10-28
Supplement: ppat.1001163.s004.pdf [file ppat.1001163.s004.pdf]

**Table S1: Mutation distribution data for experiments presented.**

| # clones with n mutations          | WT          | A372V       | S299T       | WT ribavirin | A372V ribavirin | S299T ribavirin |
|------------------------------------|-------------|-------------|-------------|--------------|-----------------|-----------------|
| 7 mutations                        | 0           | 0           | 0           | 1            | 0               | 3               |
| 6 mutations                        | 0           | 0           | 0           | 1            | 1               | 2               |
| 5 mutations                        | 0           | 0           | 0           | 2            | 0               | 7               |
| 4 mutations                        | 0           | 0           | 0           | 5            | 3               | 4               |
| 3 mutations                        | 1           | 0           | 5           | 9            | 6               | 10              |
| 2 mutations                        | 6           | 2           | 11          | 15           | 15              | 18              |
| 1 mutations                        | 40          | 14          | 70          | 25           | 29              | 14              |
| 0 mutations                        | 95          | 68          | 92          | 13           | 20              | 10              |
| <b>Total mutations</b>             | 55          | 18          | 107         | 125          | 95              | 164             |
| <b>Total # clones</b>              | 142         | 84          | 178         | 71           | 74              | 68              |
| <b>Total nt sequenced</b>          | 121,978     | 72,156      | 152,902     | 60,989       | 63,566          | 58,412          |
| <b>Mutations/10<sup>4</sup> nt</b> | <b>4.51</b> | <b>2.49</b> | <b>7.00</b> | <b>20.50</b> | <b>14.94</b>    | <b>28.08</b>    |

| # clones with n mutations          | WT amiloride | A372V amiloride | S299T amiloride | WT EIPA     | A372V EIPA  | S299T EIPA  |
|------------------------------------|--------------|-----------------|-----------------|-------------|-------------|-------------|
| 7 mutations                        | 0            | 0               | 0               | 0           | 0           | 0           |
| 6 mutations                        | 0            | 0               | 0               | 0           | 0           | 0           |
| 5 mutations                        | 1            | 0               | 0               | 0           | 0           | 0           |
| 4 mutations                        | 0            | 1               | 1               | 0           | 0           | 0           |
| 3 mutations                        | 10           | 2               | 2               | 4           | 1           | 4           |
| 2 mutations                        | 15           | 9               | 13              | 10          | 3           | 8           |
| 1 mutations                        | 38           | 39              | 29              | 27          | 16          | 24          |
| 0 mutations                        | 64           | 75              | 48              | 40          | 51          | 45          |
| <b>Total mutations</b>             | 103          | 67              | 65              | 59          | 25          | 52          |
| <b>Total # clones</b>              | 128          | 126             | 93              | 81          | 71          | 81          |
| <b>Total nt sequenced</b>          | 109,952      | 108,234         | 79,887          | 69,579      | 60,989      | 69,579      |
| <b>Mutations/10<sup>4</sup> nt</b> | <b>9.37</b>  | <b>6.19</b>     | <b>7.89</b>     | <b>8.48</b> | <b>2.49</b> | <b>7.47</b> |

| # clones with n mutations          | WT MIA      | WT benzamil | polio WT    | polio G64S  | polio WT amiloride | polio G64S amiloride |
|------------------------------------|-------------|-------------|-------------|-------------|--------------------|----------------------|
| 7 mutations                        | 0           | 0           | 0           | 0           | 0                  | 0                    |
| 6 mutations                        | 1           | 0           | 0           | 0           | 0                  | 0                    |
| 5 mutations                        | 0           | 0           | 0           | 0           | 0                  | 0                    |
| 4 mutations                        | 1           | 0           | 0           | 0           | 0                  | 0                    |
| 3 mutations                        | 3           | 1           | 2           | 0           | 6                  | 4                    |
| 2 mutations                        | 12          | 7           | 10          | 5           | 12                 | 10                   |
| 1 mutations                        | 14          | 26          | 36          | 35          | 34                 | 34                   |
| 0 mutations                        | 36          | 45          | 74          | 88          | 46                 | 64                   |
| <b>Total mutations</b>             | 57          | 43          | 62          | 45          | 72                 | 66                   |
| <b>Total # clones</b>              | 67          | 79          | 122         | 128         | 96                 | 112                  |
| <b>Total nt sequenced</b>          | 57,553      | 67,861      | 107,848     | 113,152     | 84,864             | 99,008               |
| <b>Mutations/10<sup>4</sup> nt</b> | <b>9.90</b> | <b>6.34</b> | <b>5.75</b> | <b>3.97</b> | <b>8.48</b>        | <b>7.47</b>          |

| # clones with n mutations | WT NaCl | A372V NaCl | S299T NaCl | WT CaCl <sub>2</sub> | A372V CaCl <sub>2</sub> | S299T CaCl <sub>2</sub> |
|---------------------------|---------|------------|------------|----------------------|-------------------------|-------------------------|
| 7 mutations               | 0       | 0          | 0          | 0                    | 0                       | 0                       |
| 6 mutations               | 0       | 0          | 0          | 0                    | 0                       | 0                       |

|                                    |             |             |             |             |             |             |
|------------------------------------|-------------|-------------|-------------|-------------|-------------|-------------|
| 5 mutations                        | 0           | 0           | 0           | 0           | 0           | 0           |
| 4 mutations                        | 0           | 0           | 0           | 0           | 0           | 0           |
| 3 mutations                        | 0           | 0           | 3           | 0           | 0           | 1           |
| 2 mutations                        | 4           | 1           | 10          | 4           | 0           | 13          |
| 1 mutations                        | 36          | 27          | 41          | 40          | 30          | 37          |
| 0 mutations                        | 54          | 64          | 40          | 42          | 64          | 41          |
| <b>Total mutations</b>             | 44          | 29          | 70          | 48          | 30          | 66          |
| <b>Total # clones</b>              | 94          | 92          | 94          | 90          | 94          | 92          |
| <b>Total nt sequenced</b>          | 103,400     | 101,200     | 103,400     | 99,000      | 103,400     | 92,000      |
| <b>Mutations/10<sup>4</sup> nt</b> | <b>4.26</b> | <b>2.87</b> | <b>6.77</b> | <b>4.85</b> | <b>2.90</b> | <b>7.17</b> |

| # clones with n mutations          | WT MgCl <sub>2</sub> | A372V MgCl <sub>2</sub> | S299T MgCl <sub>2</sub> | WT MnCl <sub>2</sub> | A372V MnCl <sub>2</sub> | S299T MnCl <sub>2</sub> |
|------------------------------------|----------------------|-------------------------|-------------------------|----------------------|-------------------------|-------------------------|
| 7 mutations                        | 1                    | 0                       | 0                       | 0                    | 0                       | 0                       |
| 6 mutations                        | 0                    | 0                       | 0                       | 0                    | 0                       | 0                       |
| 5 mutations                        | 2                    | 0                       | 3                       | 0                    | 0                       | 0                       |
| 4 mutations                        | 2                    | 0                       | 0                       | 1                    | 0                       | 1                       |
| 3 mutations                        | 4                    | 1                       | 1                       | 0                    | 1                       | 0                       |
| 2 mutations                        | 15                   | 8                       | 12                      | 11                   | 5                       | 15                      |
| 1 mutations                        | 35                   | 20                      | 26                      | 21                   | 37                      | 25                      |
| 0 mutations                        | 37                   | 53                      | 52                      | 22                   | 47                      | 40                      |
| <b>Total mutations</b>             | 102                  | 39                      | 68                      | 47                   | 48                      | 59                      |
| <b>Total # clones</b>              | 96                   | 82                      | 94                      | 69                   | 90                      | 81                      |
| <b>Total nt sequenced</b>          | 92,160               | 78,720                  | 90,240                  | 69,000               | 90,000                  | 81,000                  |
| <b>Mutations/10<sup>4</sup> nt</b> | <b>11.07</b>         | <b>4.95</b>             | <b>7.53</b>             | <b>6.81</b>          | <b>5.56</b>             | <b>7.28</b>             |
